# Supplementary material for: Partial connectomes of labeled dopaminergic circuits reveal non-synaptic communication and axonal remodeling after exposure to cocaine
Source: PubMed Central journal article supplement (PMC8716107; doi:10.7554/elife.71981), 2021-12-29
Supplement: elife-71981-fig3-data1.pdf [file elife-71981-fig3-data1.pdf]

| Varicosities/axon: | >1   | >2   | >3   | >4    | >5 |
|--------------------|------|------|------|-------|----|
| Varicosity Type    |      |      |      |       |    |
| I                  | 0.90 | 0.70 | 0.46 | 0.58  | 0  |
| II                 | 0.53 | 0.16 | 0.07 | 0.001 | 0  |
| III                | 0.94 | 0.02 | 0.03 | 0.006 | 0  |
| IV                 | 0.94 | 0.03 | 0.03 | 0.007 | 0  |
